# Supplementary material
Source: Research Square preprint supplement (doi:10.21203/rs.3.rs-9773242/v1)
Supplement: Supplementary file 1 [file 5a7795ab541a77df1e6ad2ec.docx]

Supplemental Table S1

Table. ICD-10 codes used for analysis

| **Condition / Procedure** | **ICD-10 Code(s)** | **Description** |
| --- | --- | --- |
| **Pulmonary Hypertension** | I27.0 | Primary pulmonary hypertension |
|  | I27.2 | Other secondary pulmonary hypertension |
|  | I27.20 | Pulmonary hypertension, unspecified |
|  | I27.21 | Secondary pulmonary arterial hypertension |
| **Pulmonary Valve Replacement** | 02RH0KZ | Replacement of pulmonary valve with synthetic substitute, open approach |
|  | 02RH3KZ | Replacement of pulmonary valve with synthetic substitute, percutaneous approach |
|  | 02RH4KZ | Replacement of pulmonary valve with synthetic substitute, percutaneous endoscopic approach |
| **Hypertension** | I10 | Essential (primary) hypertension |
| **Diabetes Mellitus** | E11.xx | Type 2 diabetes mellitus (all subcategories) |
| **Chronic Obstructive Pulmonary Disease (COPD)** | J44.x | Chronic obstructive pulmonary disease (all subcategories) |
| **Emphysema** | J43.9 | Emphysema, unspecified |
| **Obesity** | E66.x | Overweight and obesity (all subcategories) |
| **Asthma** | J45.x | Asthma (all subcategories) |

“.xx” indicates inclusion of all subcodes under that ICD-10 category (e.g., E11.0–E11.9 for type 2 diabetes mellitus; J45.20–J45.99 for asthma).
